# Supplementary material for: Morindone from Morinda citrifolia as a potential antiproliferative agent against colorectal cancer cell lines
Source: PubMed Central journal article supplement (PMC9275698; doi:10.1371/journal.pone.0270970), 2022-07-12

S1 Fig. GCMS and 1D-NMR spectrum of Nordamnacanthal (1).

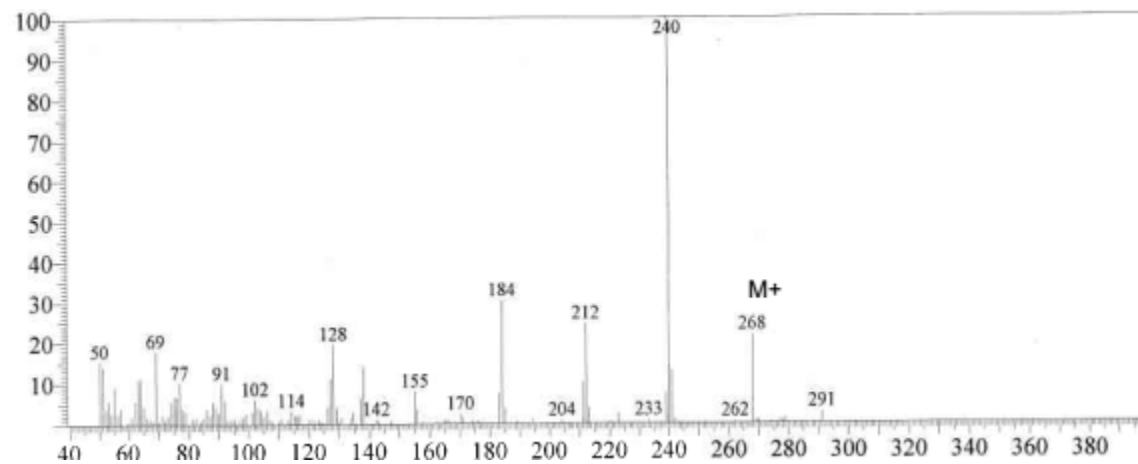

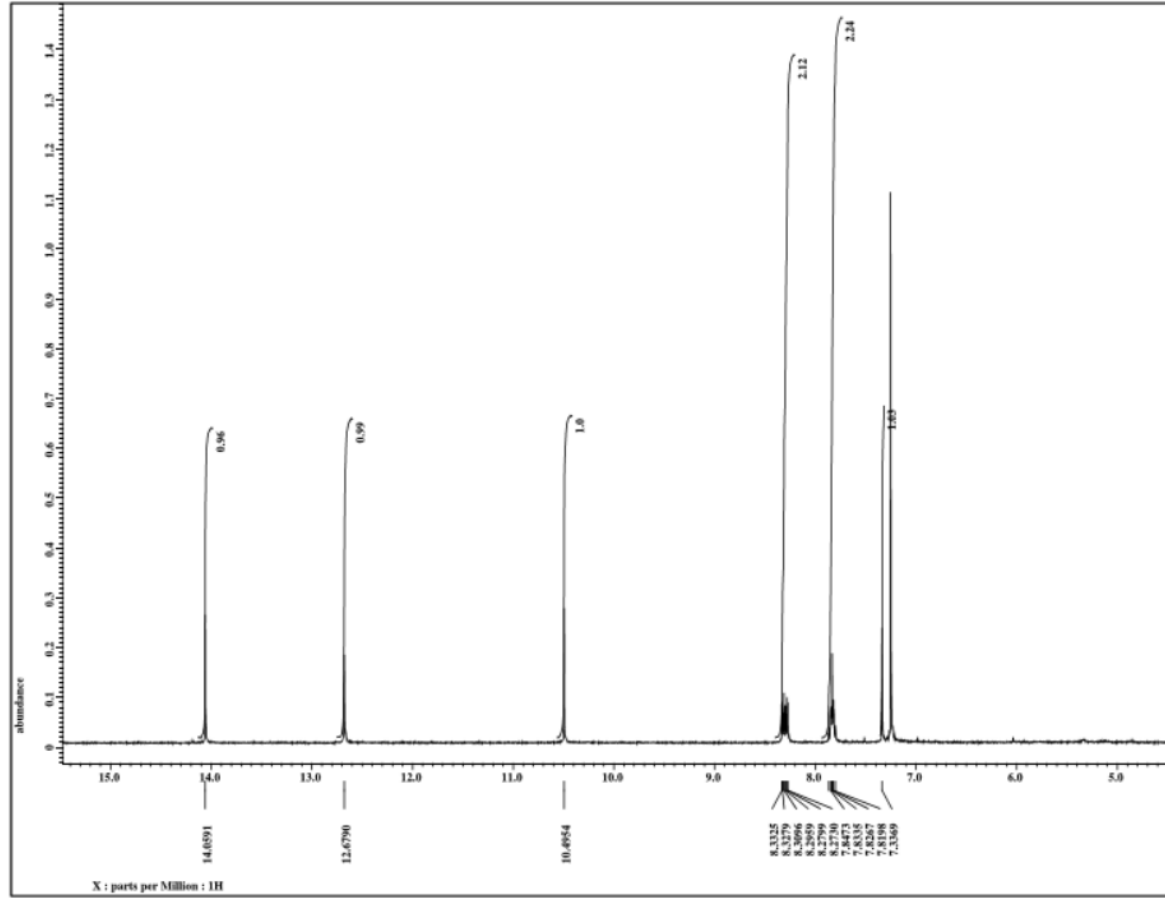

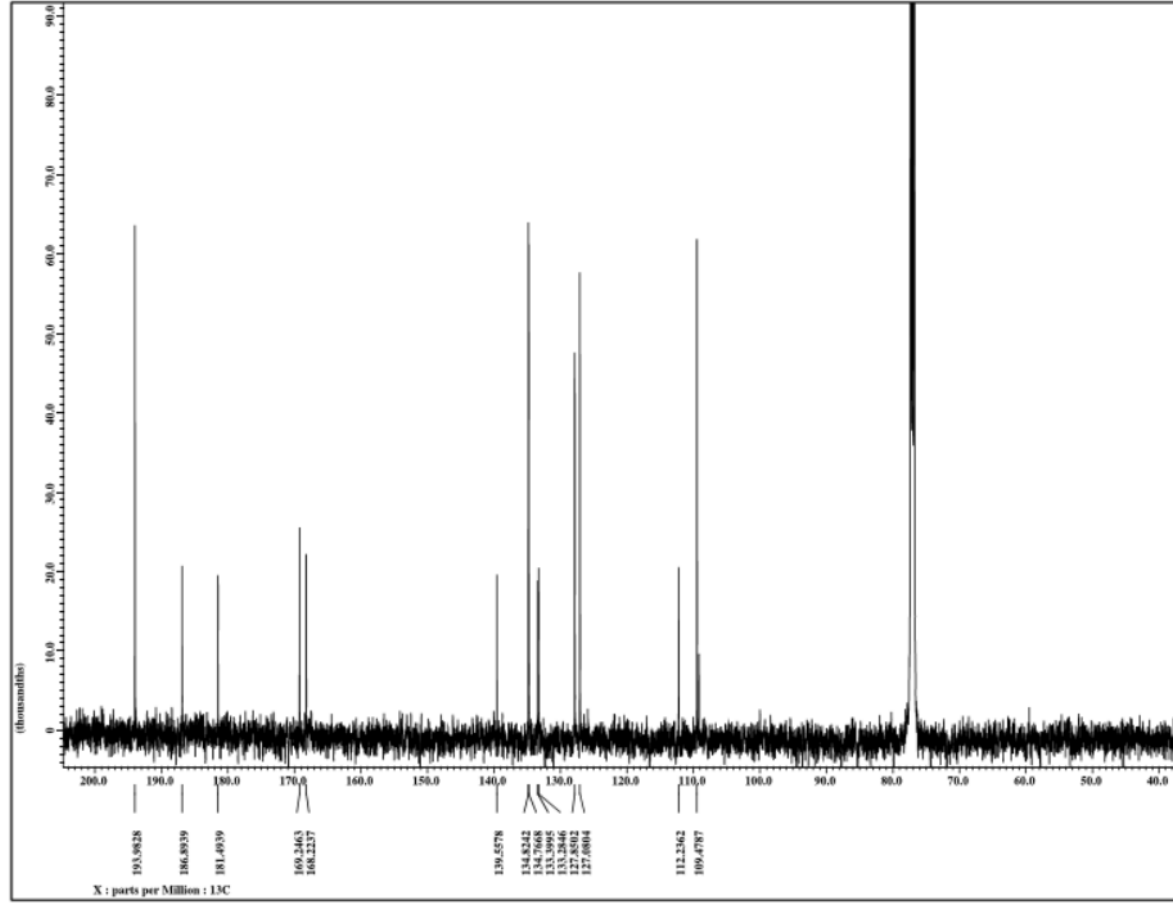

S2 Fig. GCMS and 1D-NMR spectrum of Damnacanthal (2).

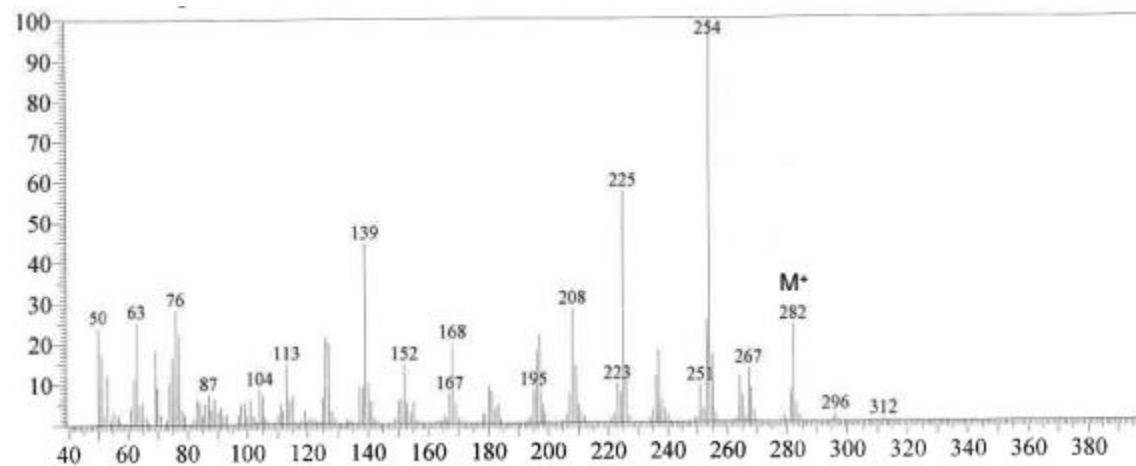

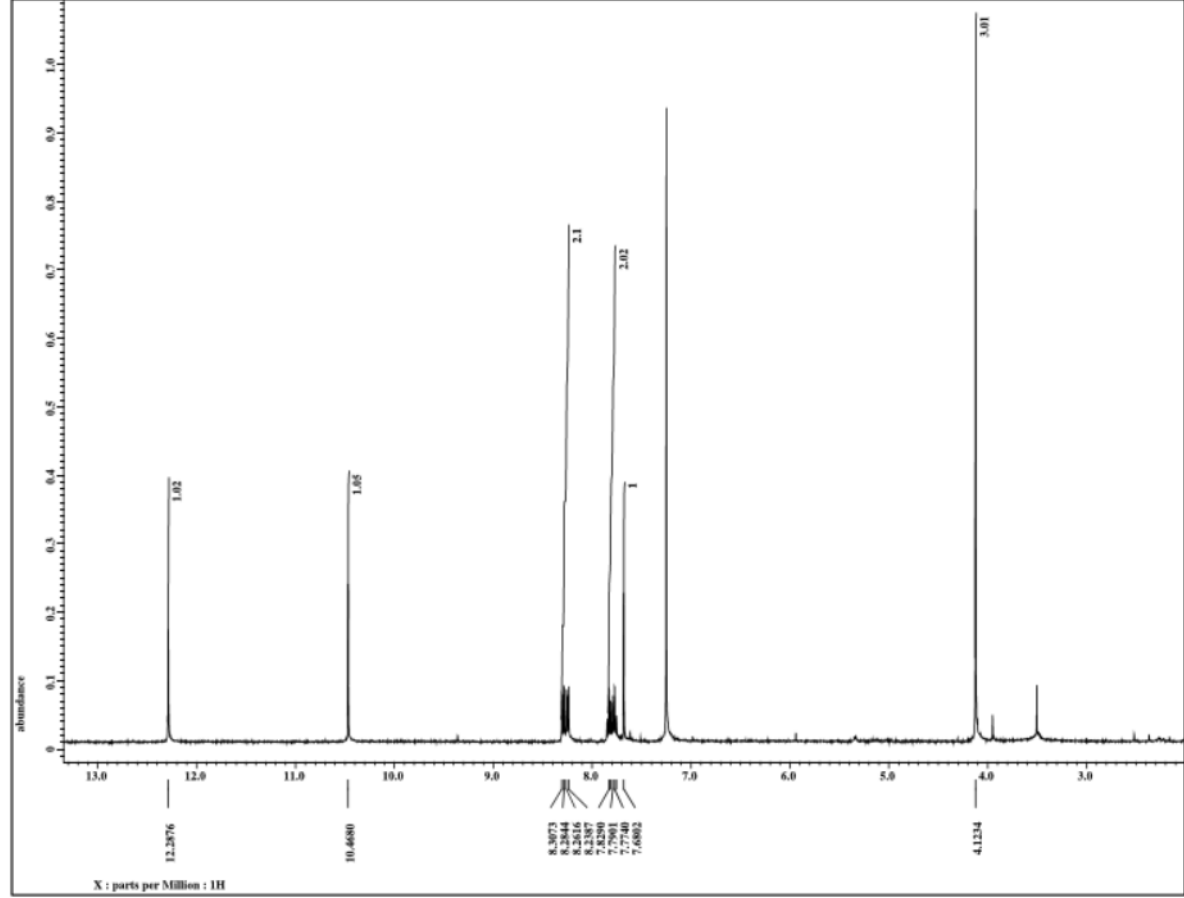

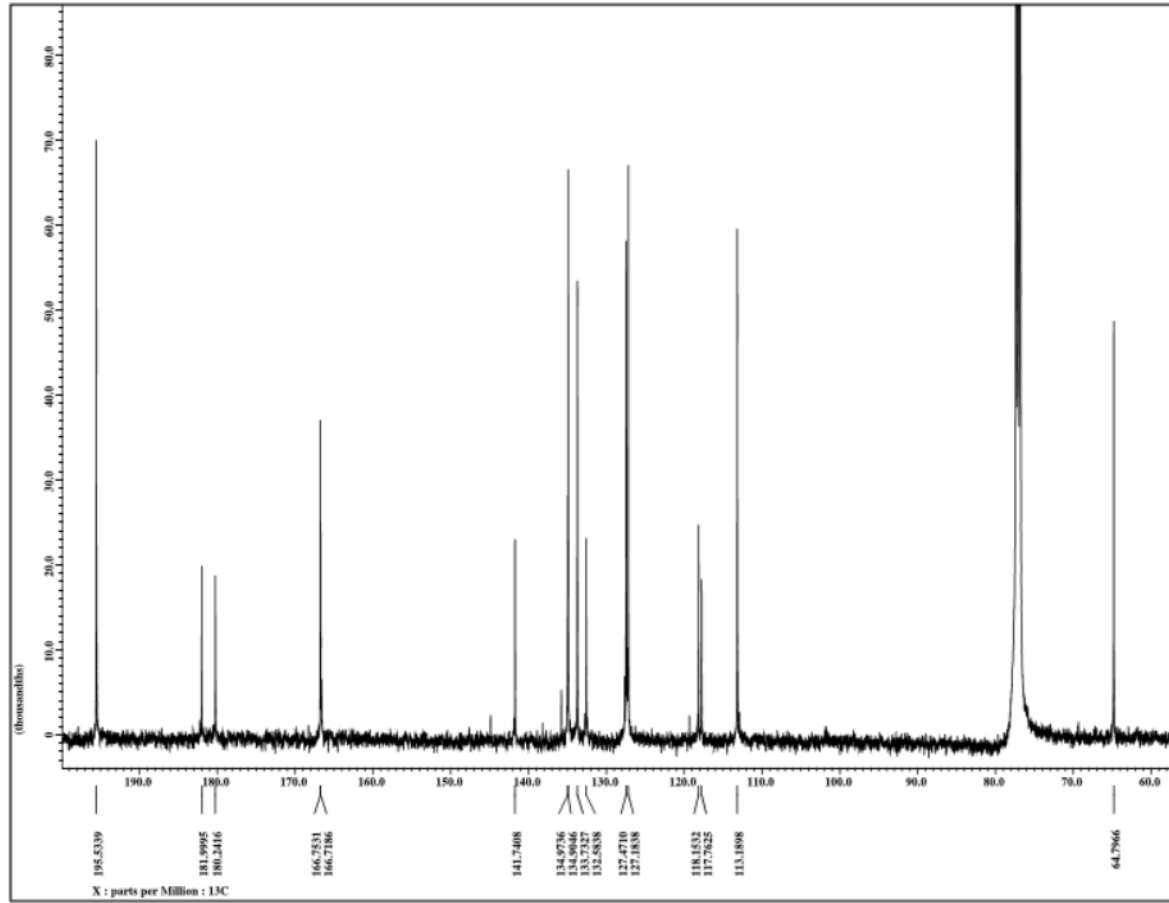

S3 Fig. GCMS and 1D-NMR spectrum of 1,3,5-trihydroxy-2-methoxy-6-methyl anthraquinone (3).

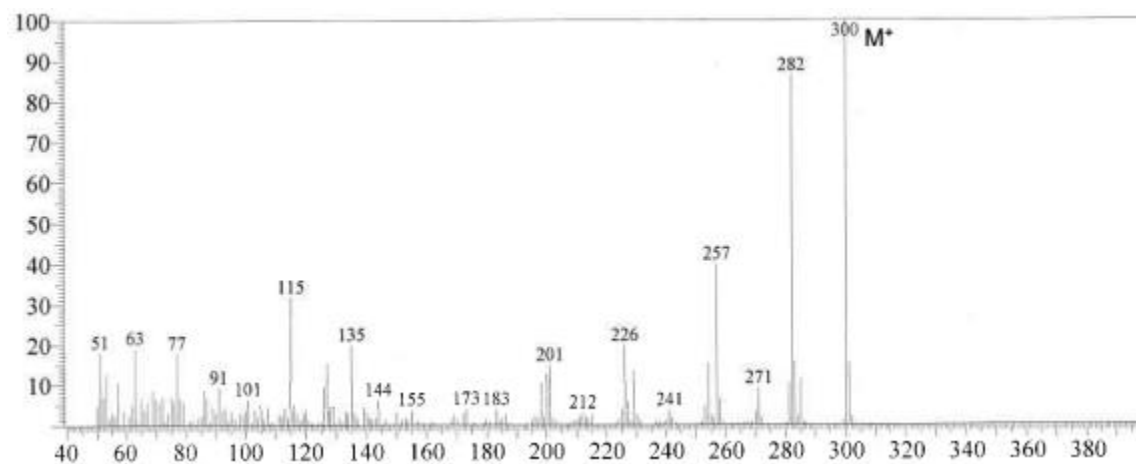

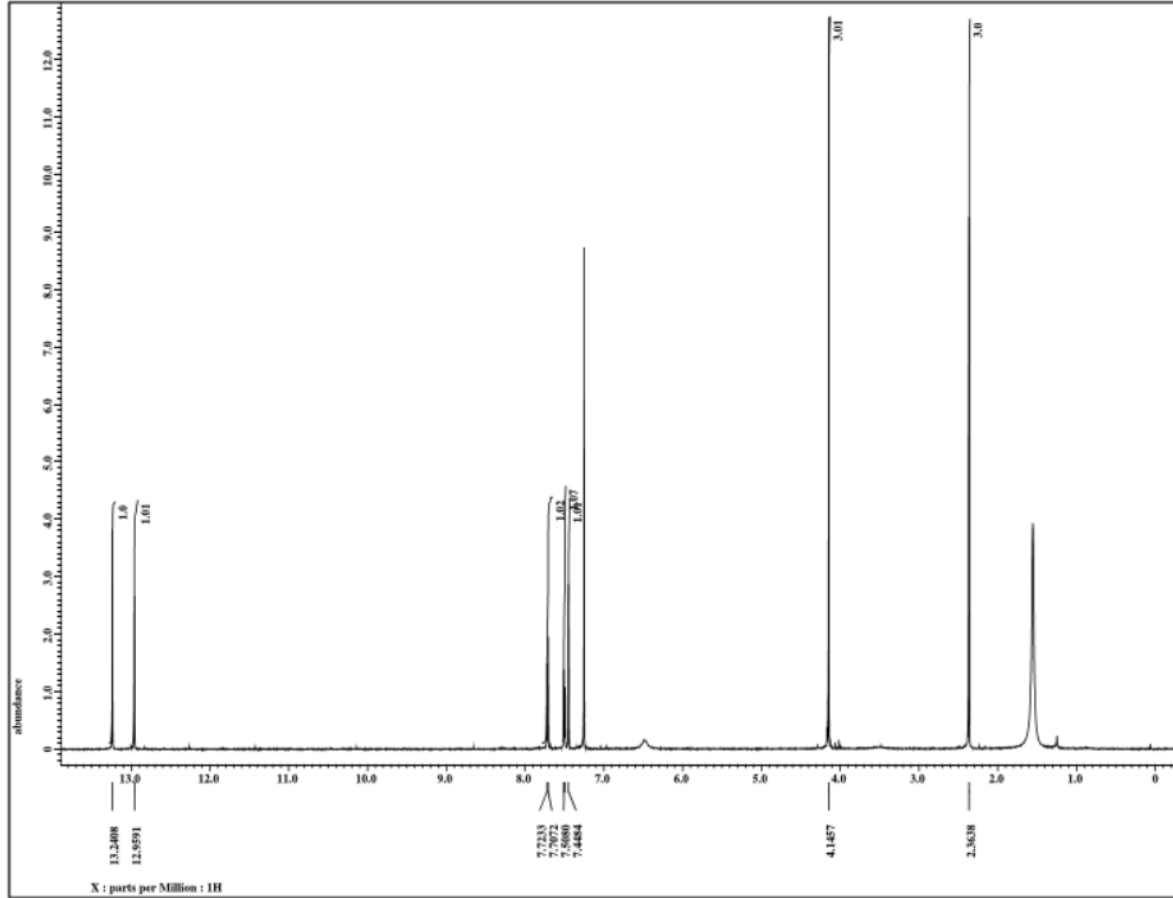



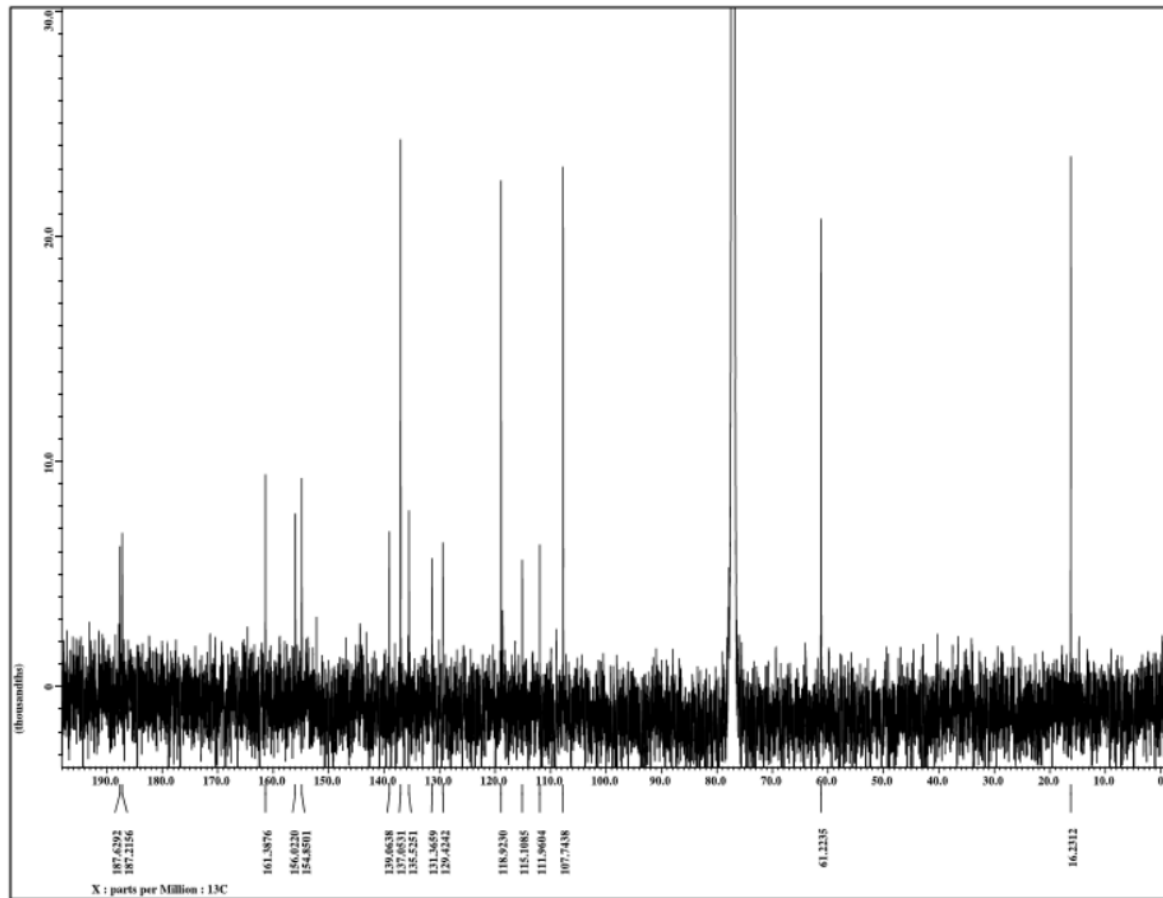

S4 Fig. GCMS and 1D-NMR spectrum of Sorendiol (5).

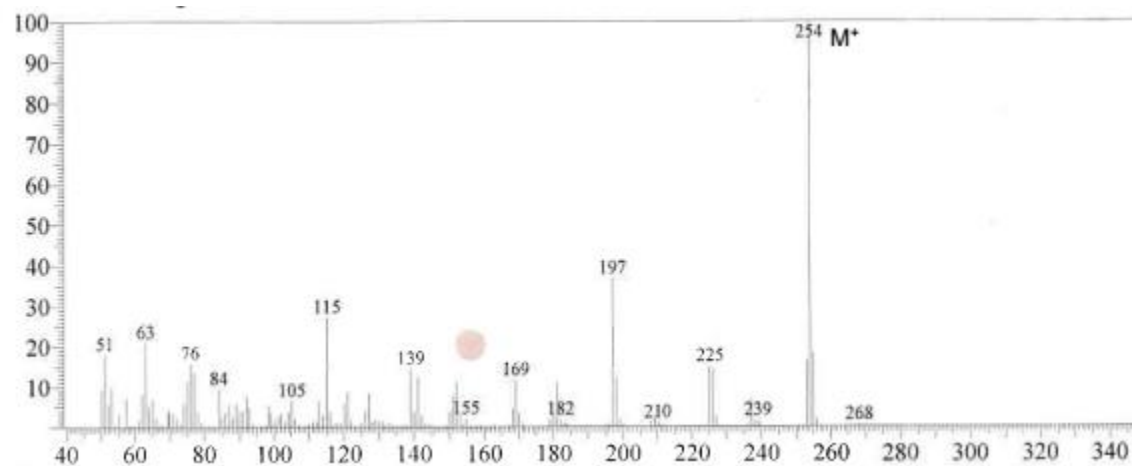

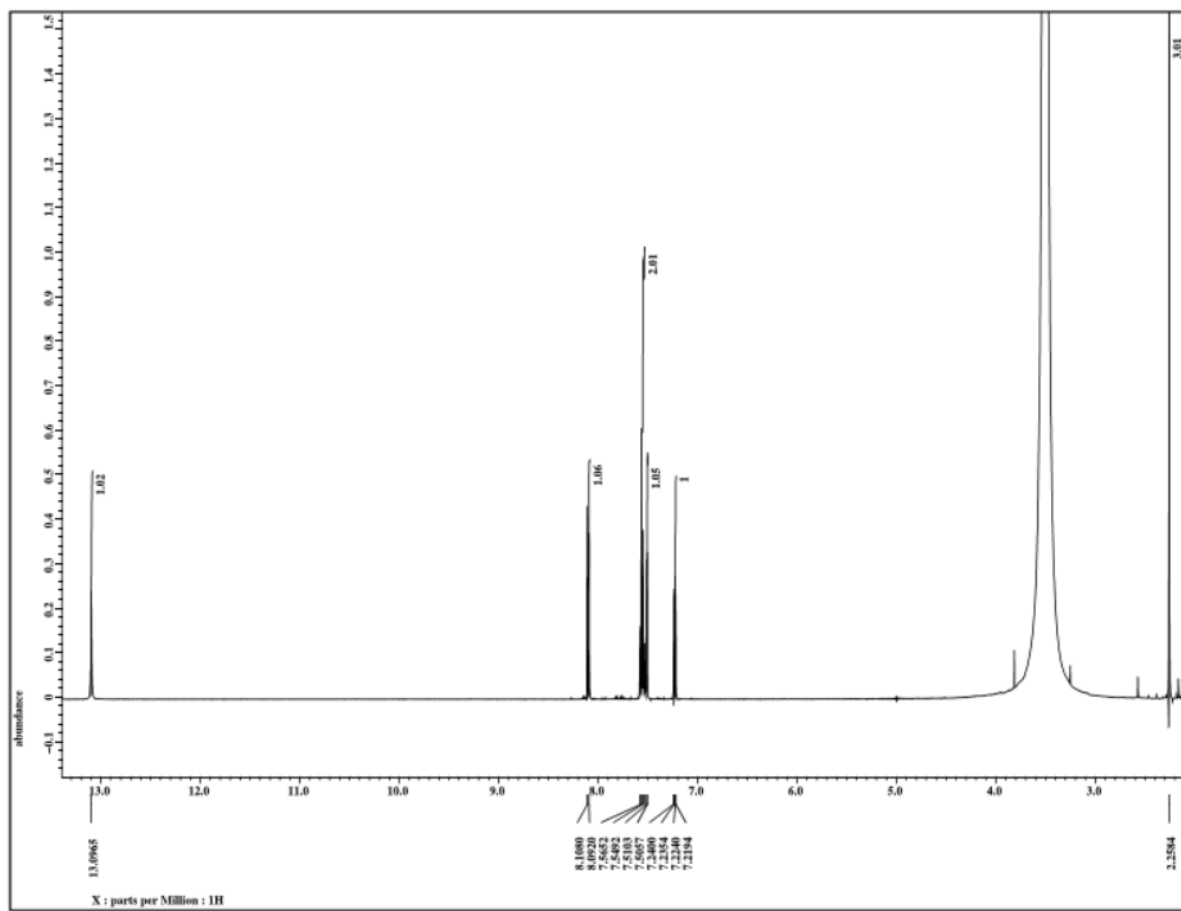

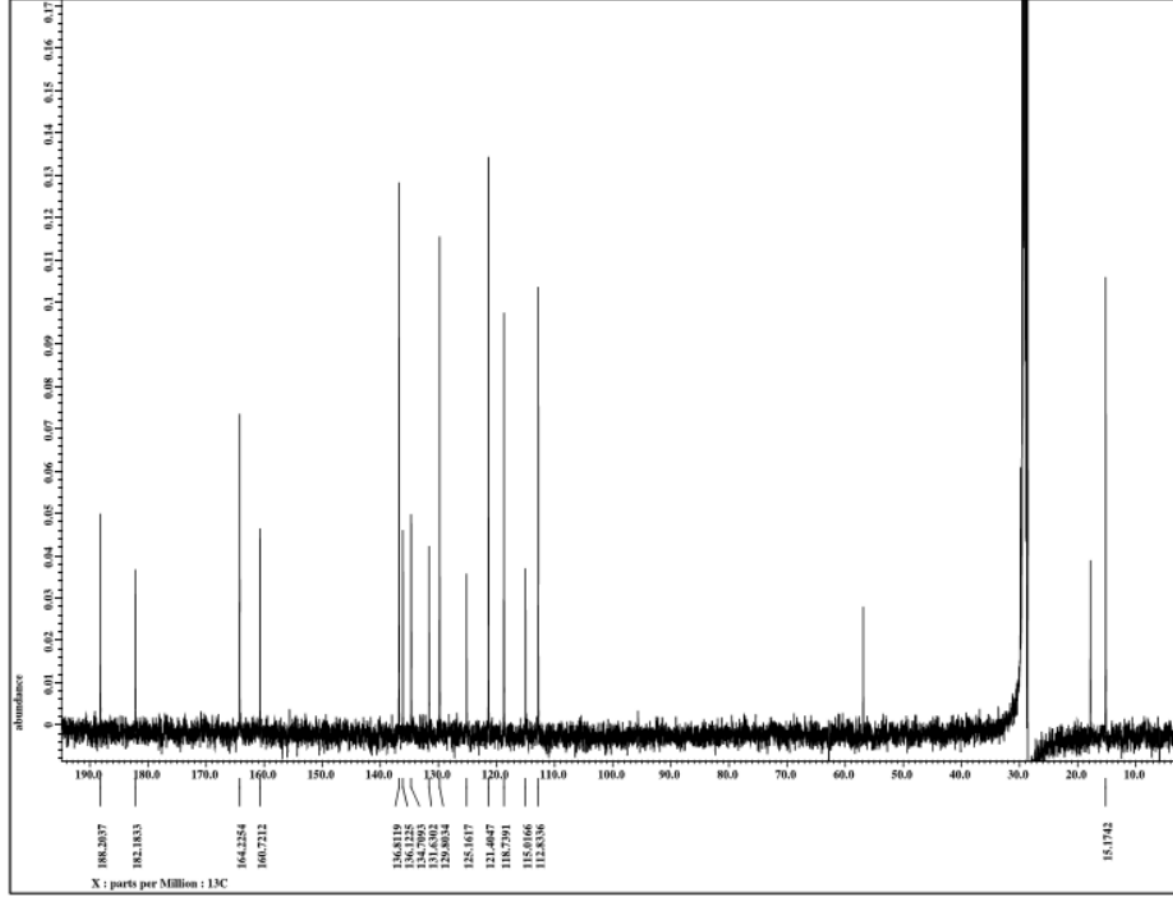

S5 Fig. GCMS and 1D-NMR spectrum of Rubiadin (6).

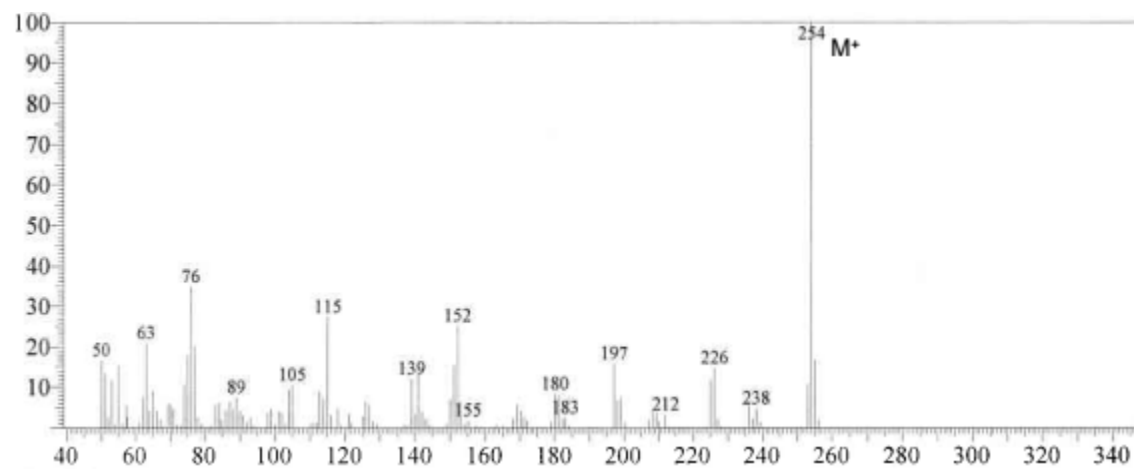

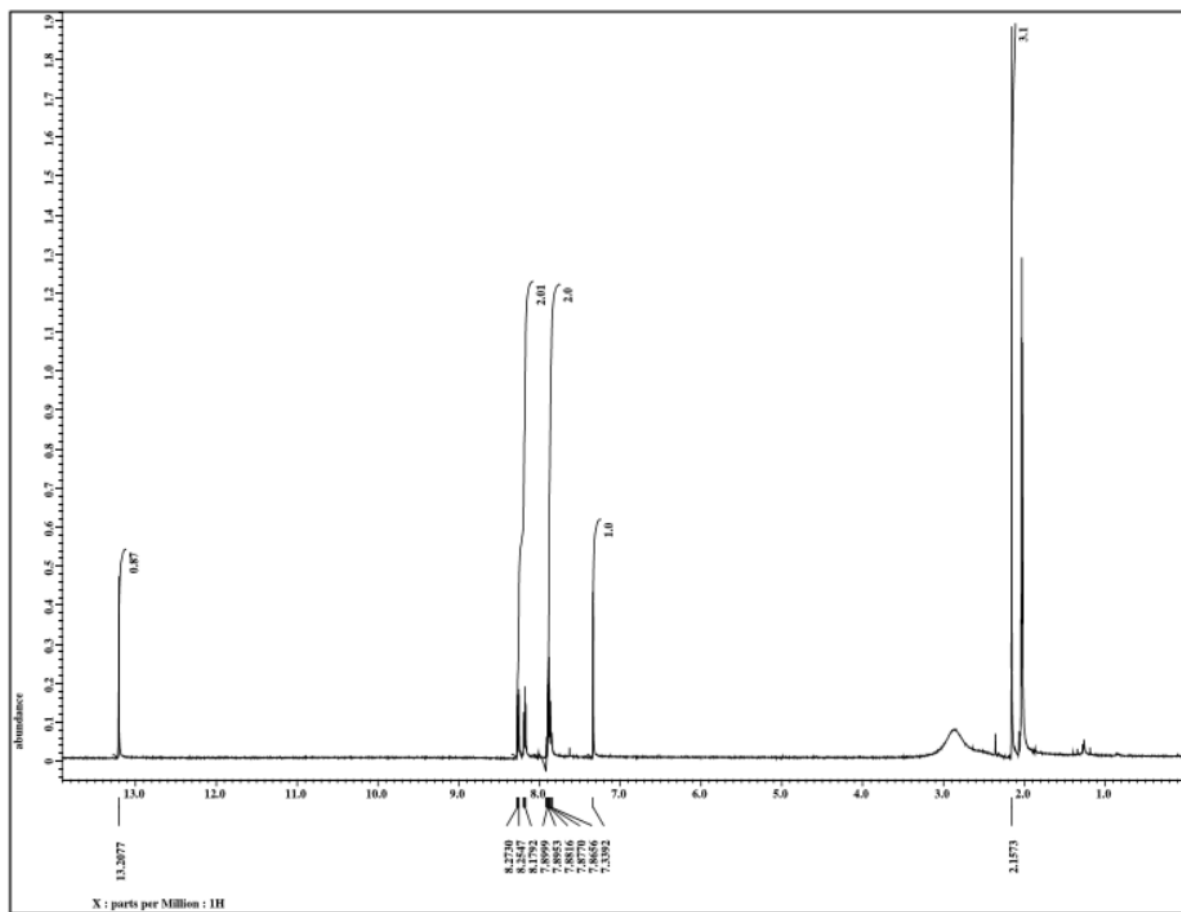

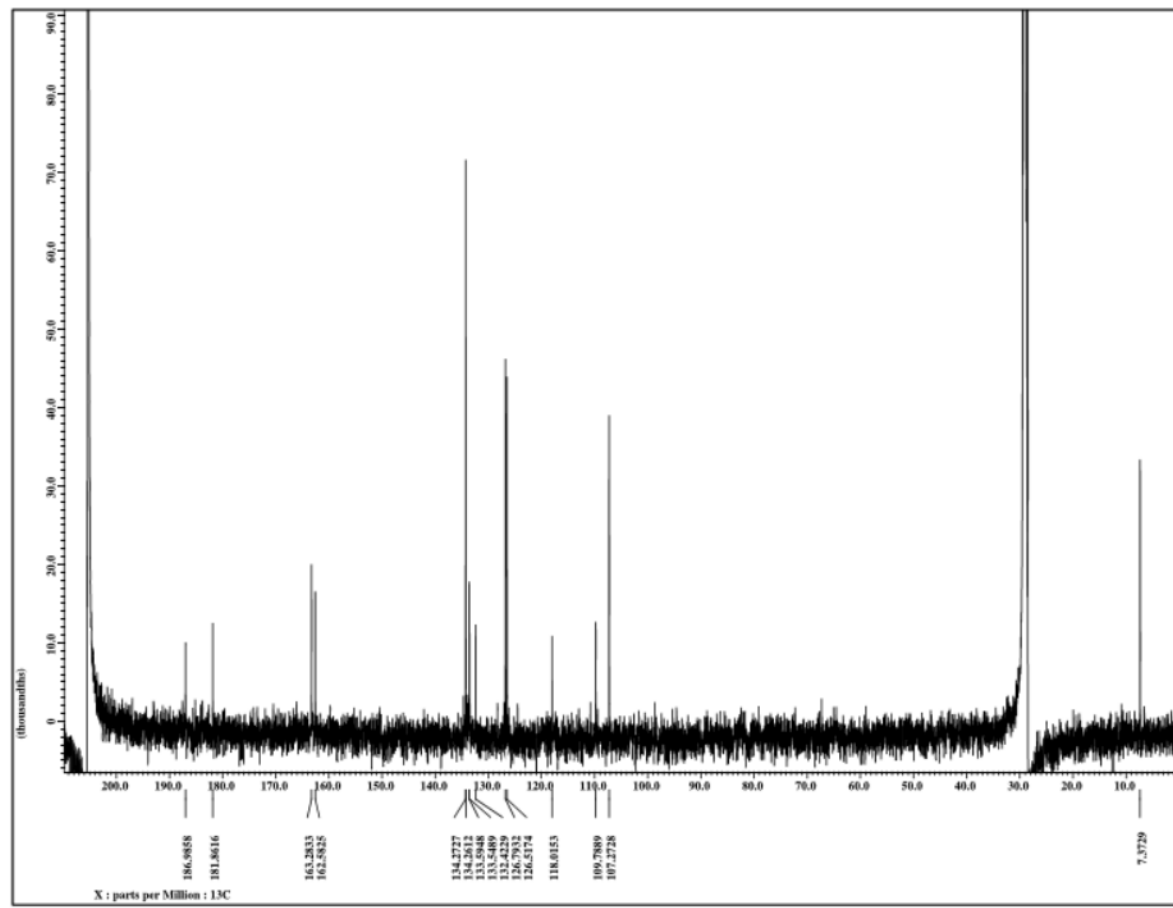

S6 Fig. GCMS and 1D-NMR spectrum of Damnacanthol (7).

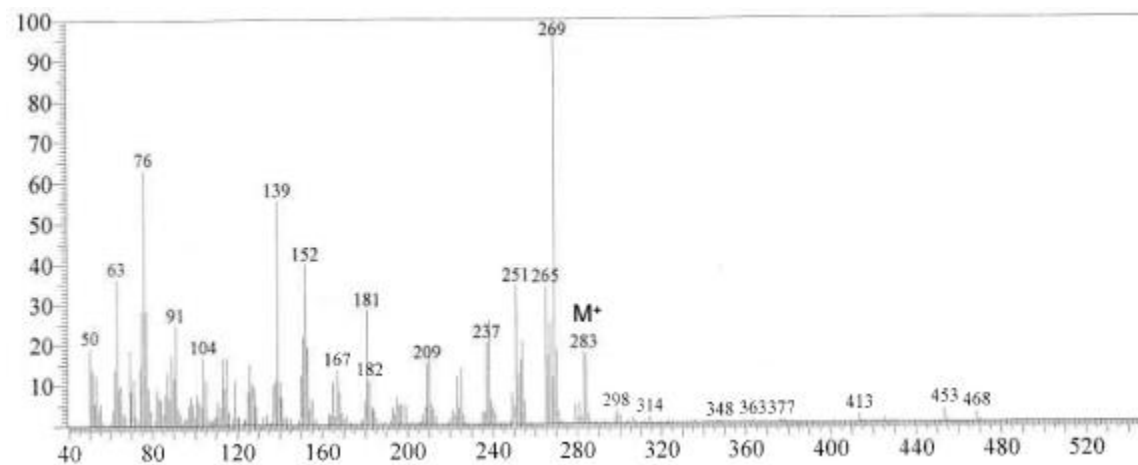



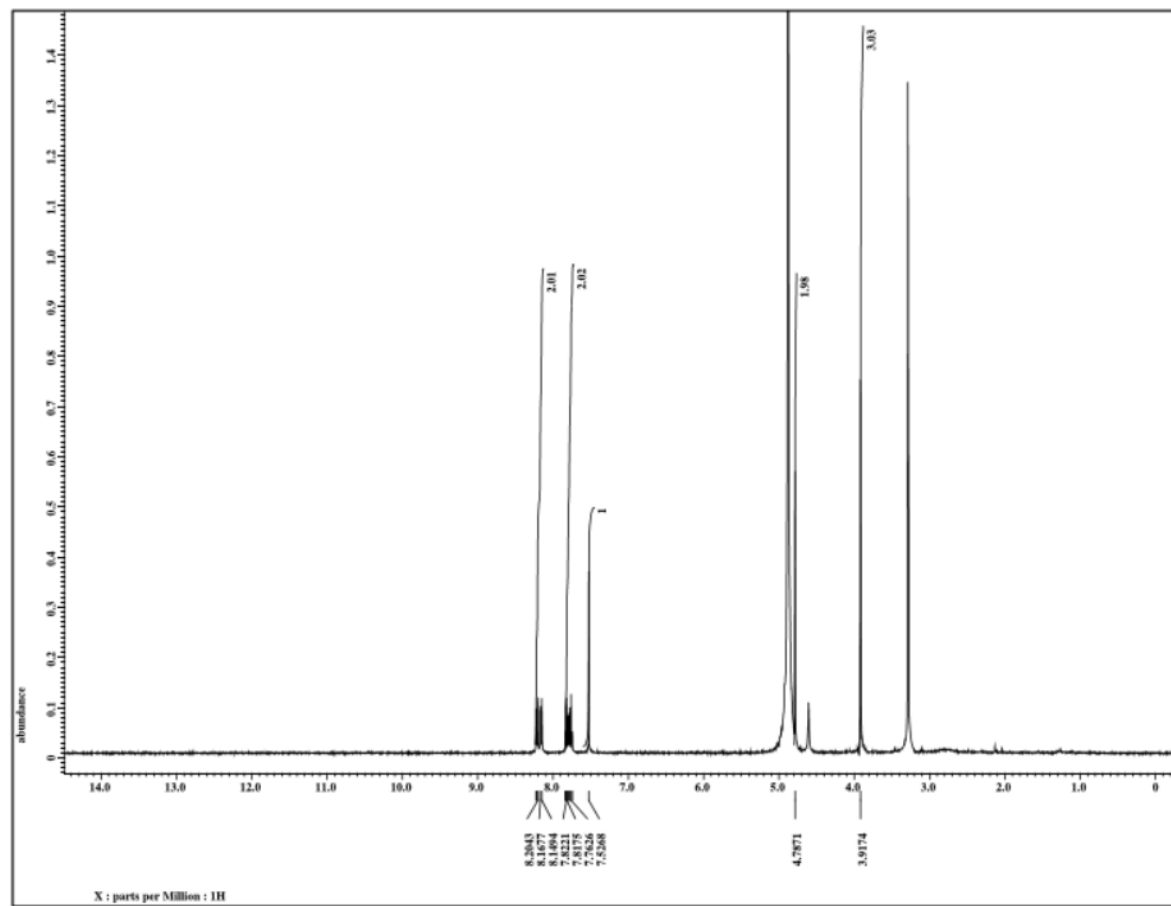

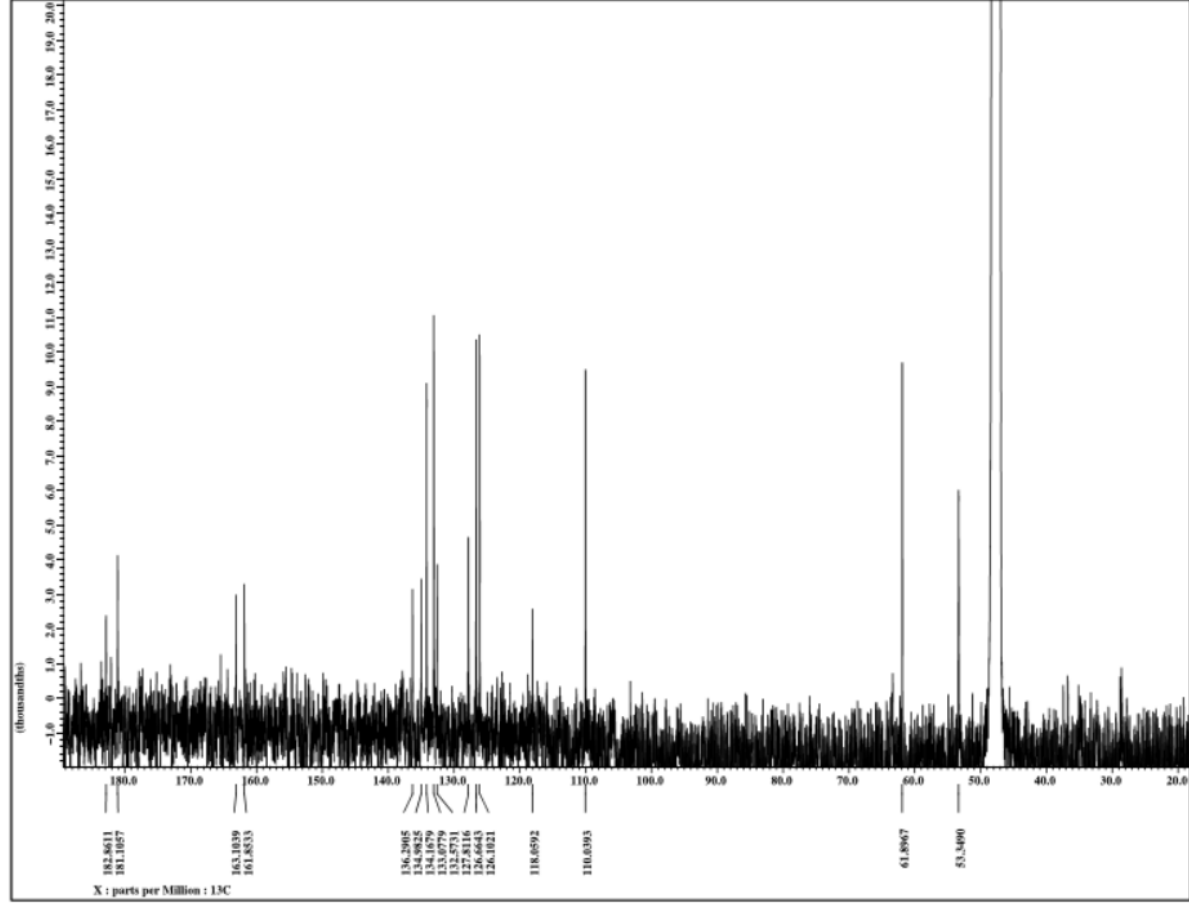

S7 Fig. GCMS and 1D-NMR spectrum of Lucidin- $\omega$ -methylether (8).

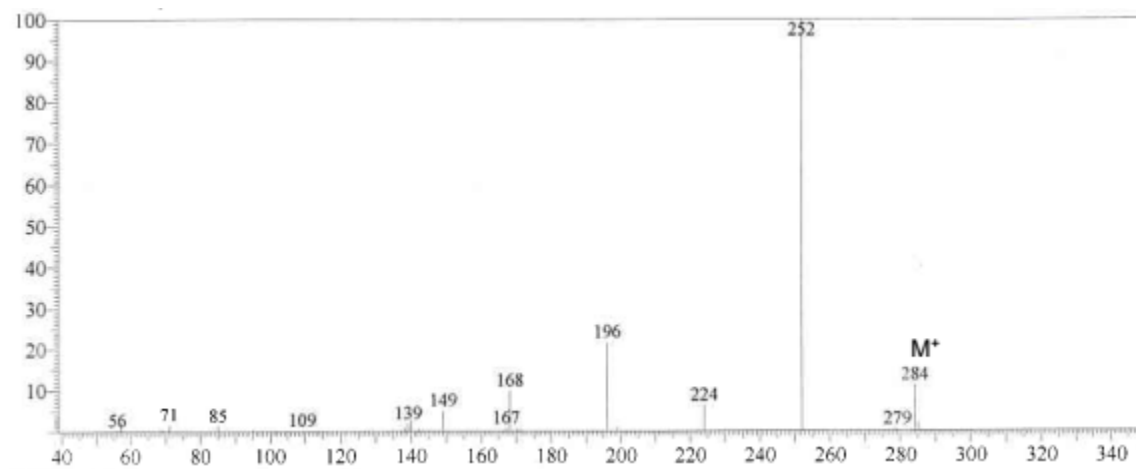

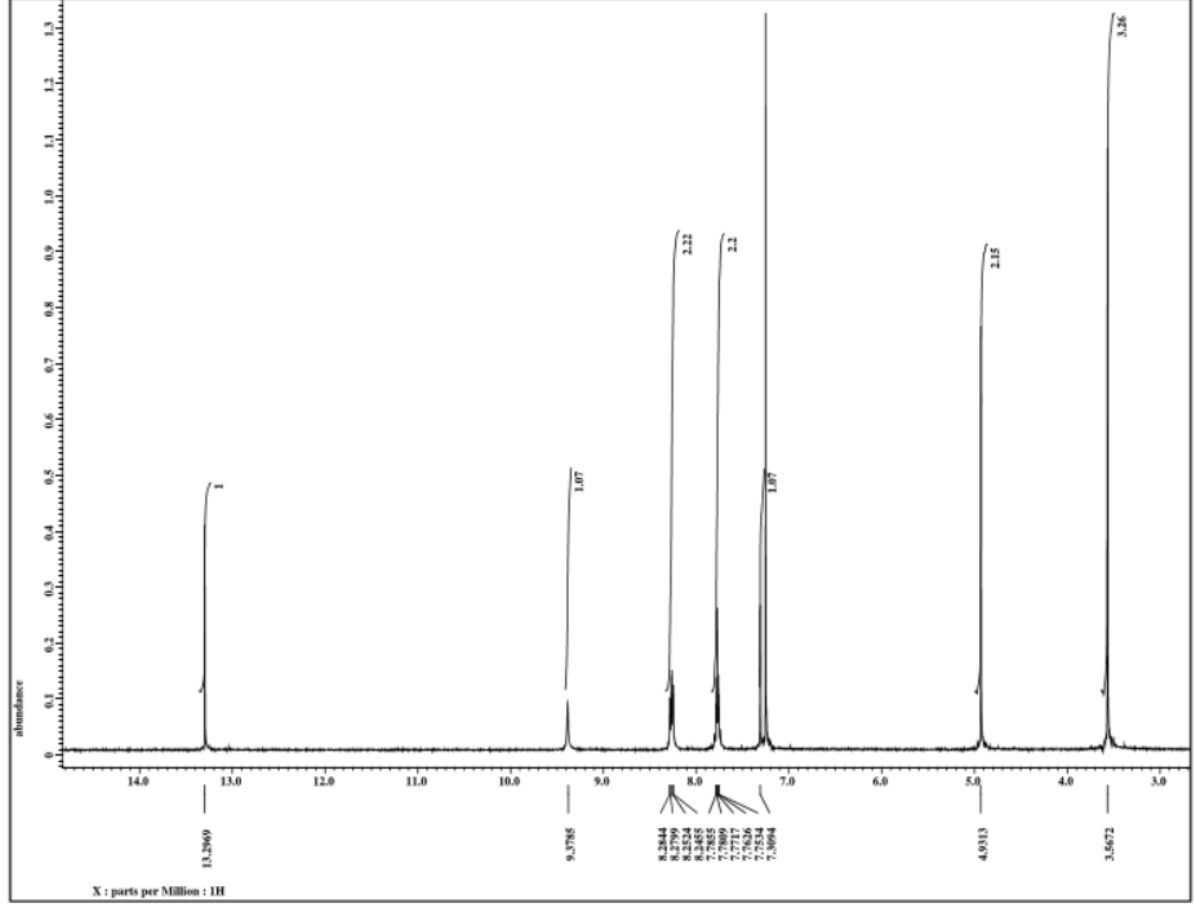

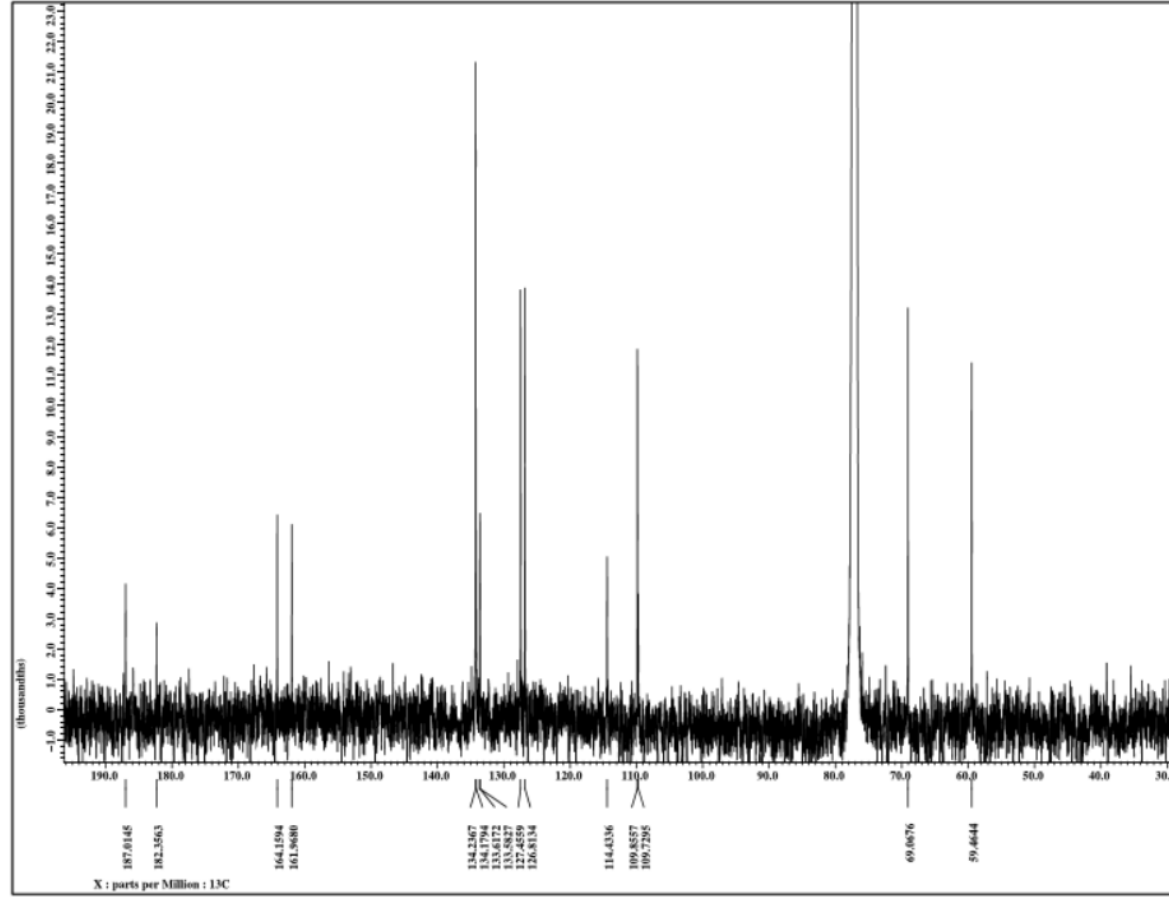

Supplement: pone.0270970.s001.pdf [file pone.0270970.s001.pdf]
