# Supplementary material for: Morindone from Morinda citrifolia as a potential antiproliferative agent against colorectal cancer cell lines
Source: PubMed Central journal article supplement (PMC9275698; doi:10.1371/journal.pone.0270970), 2022-07-12
Supplement: pone.0270970.s002.pdf [file pone.0270970.s002.pdf]

**S8 Table.  $^1\text{H}$  NMR (400 MHz) and  $^{13}\text{C}$  NMR (125 MHz) spectral data of morindone (4) in Acetone- $\text{d}_6$ .**

| Position      | Morindone (4) in Acetone- $\text{d}_6$ |                     |
|---------------|----------------------------------------|---------------------|
|               | $^1\text{H}$ NMR                       | $^{13}\text{C}$ NMR |
| 1             | 7.72 (d,1H, $J=8.1$ )                  | 118.6               |
| 2             | 7.64 (d,1H, $J=8.1$ )                  | 136.8               |
| 3             | 2.32 (s, 3H)                           | 135.6               |
| 4             | -                                      | 161.1               |
| 4a            | -                                      | 115.3               |
| 5             | 7.78 (d,1H, $J=8.0$ )                  | 121.3               |
| 5a            | -                                      | 124.3               |
| 6             | 7.27 (d,1H, $J=8.0$ )                  | 120.7               |
| 7             | -                                      | 151.1               |
| 8             | -                                      | 153.2               |
| 8a            | -                                      | 116.4               |
| 9             | -                                      | 188.6               |
| 9a            | -                                      | 131.3               |
| 10            | -                                      | 187.5               |
| $\text{CH}_3$ | -                                      | 14.2                |
| 4-OH          | 13.25 (s,1H)                           | -                   |
| 8-OH          | 12.84 (s,1H)                           | -                   |

$\delta$  in ppm,  $J$  in Hz.
